# Supplementary material
Source: PubMed Central journal article supplement (PMC6478557)
Supplement: NIHMS1523535-supplement-1.pdf [file NIHMS1523535-supplement-1.pdf]

SUPPLEMENTARY DATA

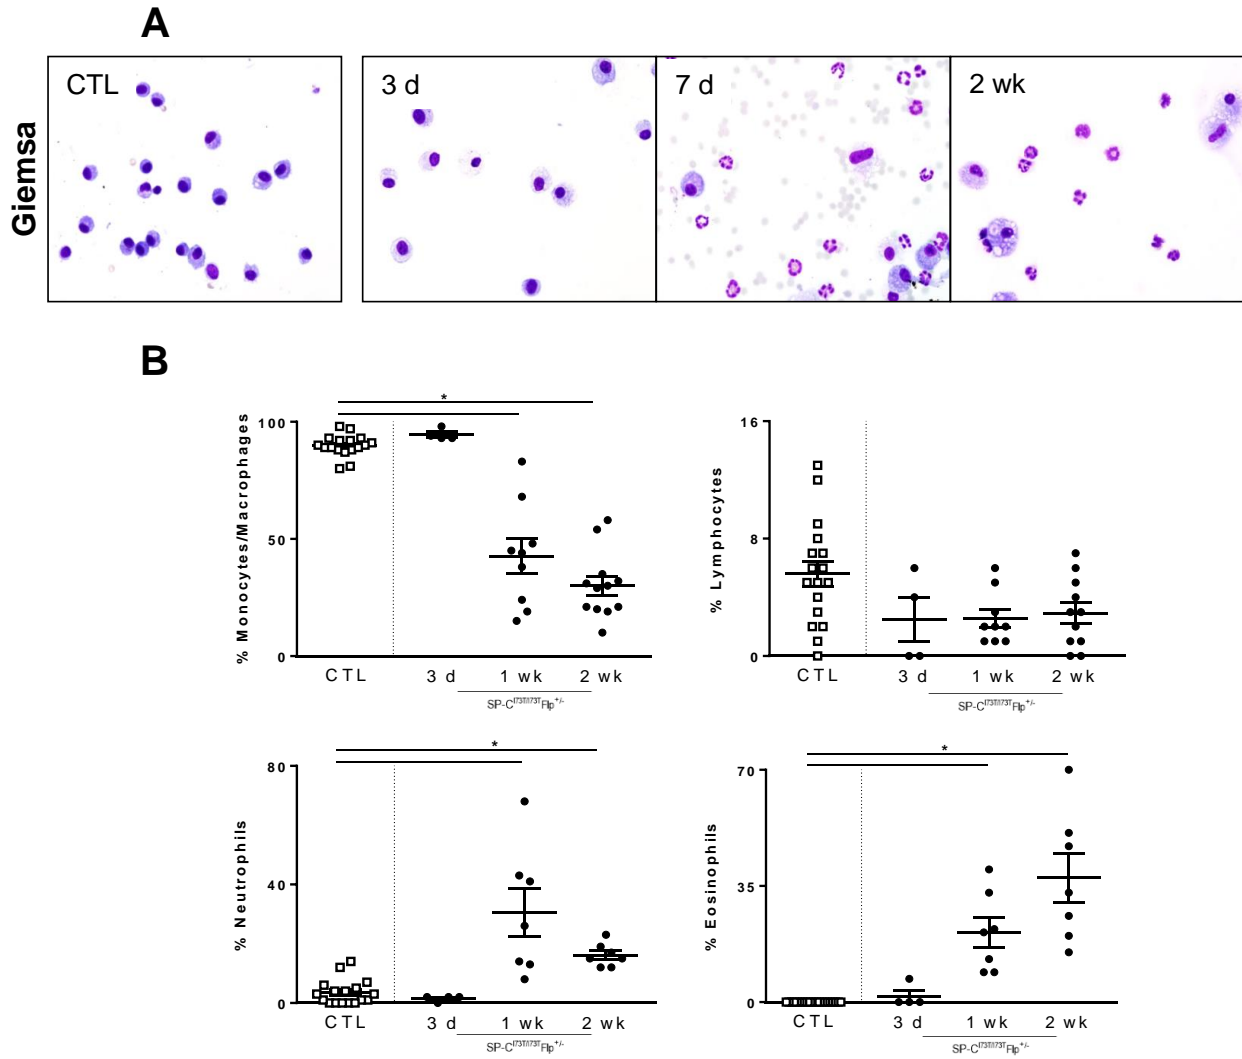

**Supp. Fig. 1 Differential analysis of BALF cytopsin.** (A) Representative cytopsin of BALF cells obtained from control (tamoxifen treated SP-C<sup>WT/WT</sup>Flp<sup>+/+</sup> or oil treated SP-C<sup>I73T/I73T</sup>Flp<sup>+/-</sup> mice) and SP-C<sup>I73T/I73T</sup>Flp<sup>+/-</sup> mice 3 d, 7 d, and 2 wk following intraperitoneal tamoxifen administration (250 mg/kg). (B) Relative quantitation of the changes in macrophage (top left), neutrophils (bottom left), lymphocyte (top right) and eosinophils (bottom right) obtained from cytopsin differential analysis of control (tamoxifen treated SP-C<sup>WT/WT</sup>Flp<sup>+/+</sup> or oil treated SP-C<sup>I73T/I73T</sup>Flp<sup>+/-</sup> mice) and SP-C<sup>I73T/I73T</sup>Flp<sup>+/-</sup> mice 3 d, 7 d, and 2 wk following intraperitoneal tamoxifen administration (250 mg/kg). Data is represented as mean ± SEM (N=4-18). Differences between groups were compared using one-way ANOVA, using Tukey post-hoc test. \* p < 0.05 compared to control SP-C<sup>WT/WT</sup>Flp<sup>+/+</sup> or oil treated SP-C<sup>I73T/I73T</sup>Flp<sup>+/-</sup> mice SP-C<sup>I73T/I73T</sup>ER<sup>-/-</sup> by ANOVA, using Tukey post-hoc test.

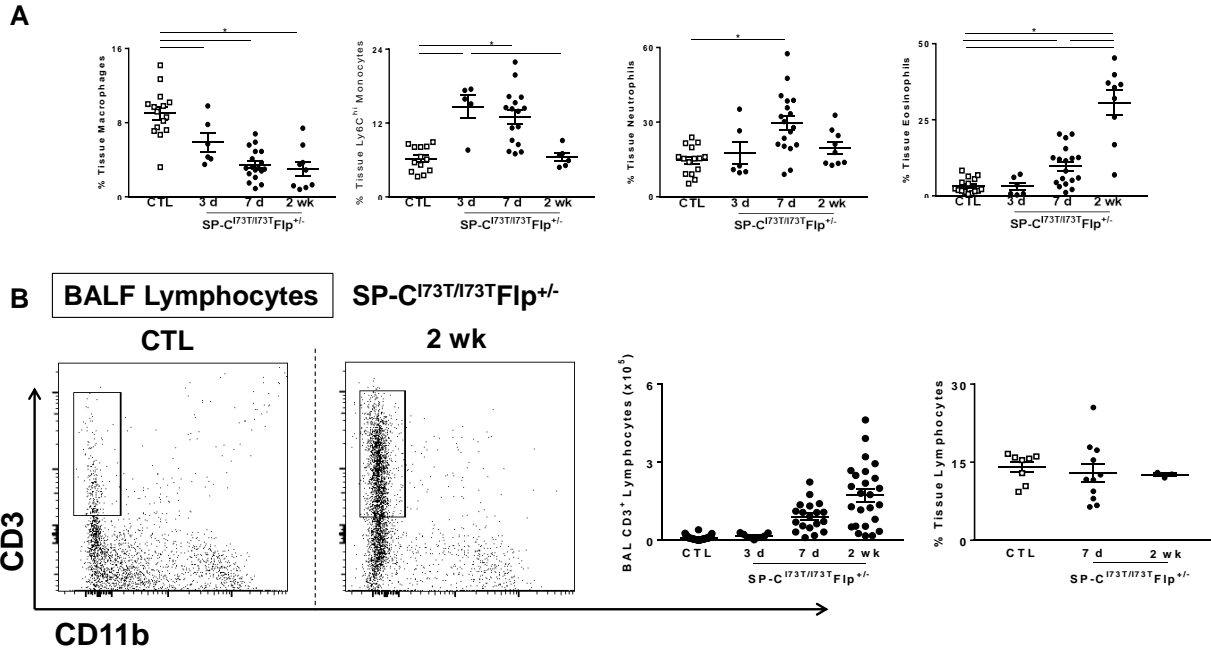

**Supp. Fig. 2. Temporal changes in BALF and tissue macrophage, neutrophil, and eosinophil and lymphocyte populations.** (A) Time dependent changes in tissue macrophages, monocytes, neutrophils and eosinophils collected from control (tamoxifen treated SP-C<sup>WT/WT</sup>Flp<sup>+/+</sup> or oil treated SP-C<sup>I73T/I73T</sup>Flp<sup>+/-</sup> mice) and SP-C<sup>I73T/I73T</sup>Flp<sup>+/-</sup> mice 3 days, 7 days, and 2 weeks following intraperitoneal tamoxifen administration (250 mg/kg). (B) Time course of the changes in BALF and tissue lymphocytes collected from control (tamoxifen treated SP-C<sup>WT/WT</sup>Flp<sup>+/+</sup> or oil treated SP-C<sup>I73T/I73T</sup>Flp<sup>+/-</sup> mice) and SP-C<sup>I73T/I73T</sup>Flp<sup>+/-</sup> mice 3 days, 7 days, and 2 weeks following intraperitoneal tamoxifen administration (250 mg/kg).

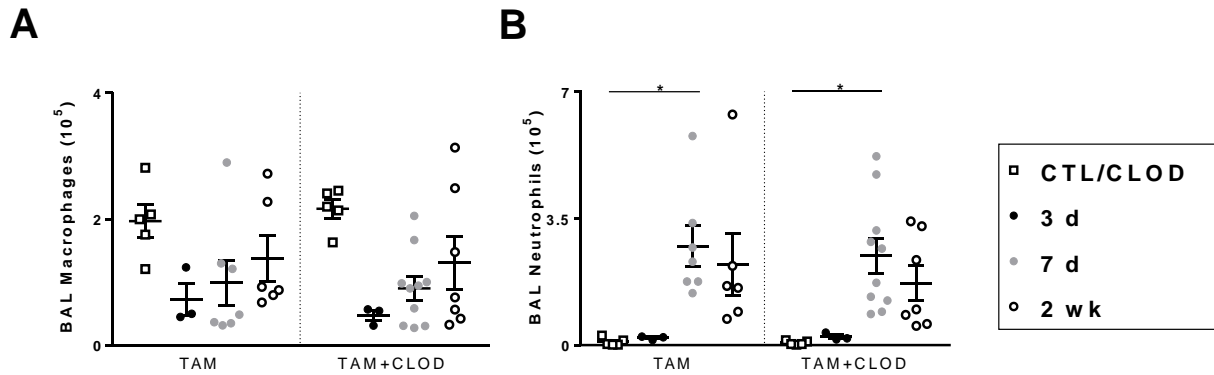

**Supp. Fig. 3. Systemic monocyte depletion with clodronate liposomes does not affect alveolar macrophage and neutrophil numbers in BALF and tissue of SP-C<sup>I73T</sup> mice.** (A) Changes in absolute counts of BALF SigF<sup>+</sup>CD11b<sup>-</sup> macrophages and (B) Ly6G<sup>+</sup> neutrophils from control (tamoxifen treated SP-C<sup>WT/WT</sup>Flp<sup>+/+</sup> or oil treated SP-C<sup>I73T/I73T</sup>Flp<sup>+/+</sup> mice) and SP-C<sup>I73T/I73T</sup>Flp<sup>+/-</sup> mice 3 d, 7 d and 2 weeks following intraperitoneal tamoxifen (250 mg/kg) and intravascular clodronate (150  $\mu$ g/kg, 2 h post tamoxifen injection) administration. Data is represented as mean  $\pm$  SEM (N=3-8). \*  $p < 0.05$  compared to control SP-C<sup>WT/WT</sup>Flp<sup>+/+</sup> or oil treated SP-C<sup>I73T/I73T</sup>Flp<sup>+/-</sup> mice SP-C<sup>I73T/I73T</sup>ER<sup>-/-</sup> by One-Way ANOVA, using Tukey post-hoc test.

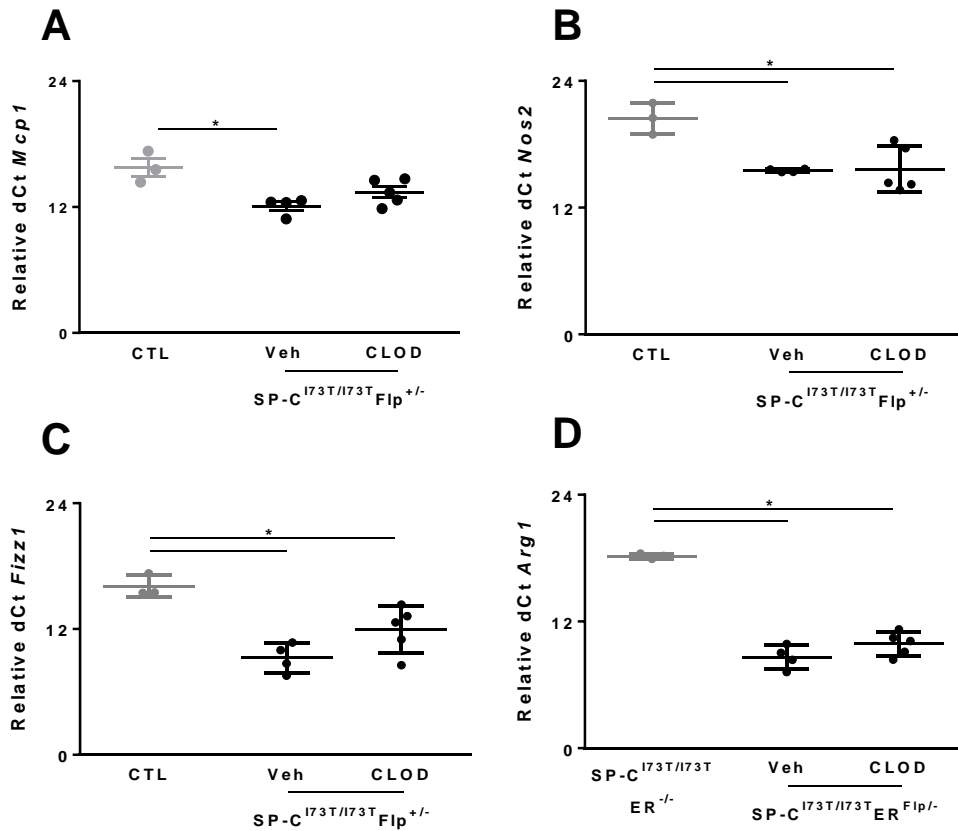

**Supp. Fig. 4. Intravascular monocyte depletion with clodronate liposomes does not affect BALF cell gene expression of SP-C<sup>I73T</sup> mice.** RT-qPCR analysis of BALF cells collected from control (tamoxifen treated SP-C<sup>WT/WT</sup>Flp<sup>+/+</sup> or oil treated SP-C<sup>I73T/I73T</sup>Flp<sup>+/-</sup> mice) and SP-C<sup>I73T/I73T</sup>Flp<sup>+/-</sup> mice 2 wk following intraperitoneal tamoxifen (250 mg/kg) and intravascular clodronate (150  $\mu$ g/kg, 2 h post tamoxifen injection) administration for markers associated with (A) recruitment (*Mcp1*), (B) pro-inflammatory (*Nos2*) and (C-D) anti-inflammatory (*Arg1* and *Fizz1*) activation. Data is represented as mean  $\pm$  SEM (N=3-5). \*  $p < 0.05$  compared to control SP-C<sup>WT/WT</sup>Flp<sup>+/+</sup> or oil treated SP-C<sup>I73T/I73T</sup>Flp<sup>+/-</sup> mice SP-C<sup>I73T/I73T</sup>ER<sup>-/-</sup> by One-Way ANOVA, using Tukey post-hoc test.
